# Supplementary material for: Early Results of a Screening Program for Skin Cancer in Liver Transplant Recipients: A Cohort Study
Source: MDPI journal article supplement (doi:10.3390/cancers16061224), 2024-03-20
Supplement: s1 [file s1]

| <b>Table S1. Characteristics of liver transplant recipients with skin cancer/preneoplastic lesions</b> |            |                  |                   |                                                                                                      |                                                                                                                                                                                                                                                       |                                                |                                     |                       |
|--------------------------------------------------------------------------------------------------------|------------|------------------|-------------------|------------------------------------------------------------------------------------------------------|-------------------------------------------------------------------------------------------------------------------------------------------------------------------------------------------------------------------------------------------------------|------------------------------------------------|-------------------------------------|-----------------------|
| <b>Nr.</b>                                                                                             | <b>Sex</b> | <b>Birthyear</b> | <b>Age at LTX</b> | <b>Skin cancers &amp; preneoplastic lesions during screening period, year (n)</b>                    | <b>Previous skin cancer / preneoplastic lesions</b>                                                                                                                                                                                                   | <b>Immunosuppressive treatment</b>             | <b>LTX indication</b>               | <b>Smoking status</b> |
| 1                                                                                                      | Male       | 1939             | 58                | Actinic keratosis: 2018 (1), 2021 (2)<br>SCC: 2021 (2)                                               | Actinic keratosis: 2011 (1), 2017 (2)<br>BCC: 2013 (1)                                                                                                                                                                                                | Cyclosporin,<br>Azathioprine,<br>Prednisolone  | Primary sclerosing cholangitis      | Former                |
| 2                                                                                                      | Male       | 1959             | 53                | Actinic keratosis: 2020 (1)<br>BCC: 2019 (1)                                                         | Actinic keratosis: 2017 (1)                                                                                                                                                                                                                           | Tacrolimus,<br>Mycophenolate                   | Cirrhosis (alcoholic / cryptogenic) | Former                |
| 3                                                                                                      | Female     | 1952             | 63                | Actinic keratosis: 2019 (3) 2020 (3), 2021 (1)<br>Bowen's Disease: 2020 (1)<br>SCC: 2021 (1)         | -                                                                                                                                                                                                                                                     | Tacrolimus,<br>Mycophenolate,<br>Prednisolone  | Primary sclerosing cholangitis      | Current               |
| 4                                                                                                      | Male       | 1966             | 45                | Actinic keratosis: 2018 (1), 2020 (1), 2021 (1)                                                      | Bowen's Disease: 2012 (1)                                                                                                                                                                                                                             | Cyclosporin,<br>Mycophenolate,<br>Prednisolone | Primary sclerosing cholangitis      | Never                 |
| 5                                                                                                      | Male       | 1951             | 44                | BCC: 2018 (1)                                                                                        | BCC: 2017 (1)                                                                                                                                                                                                                                         | Cyclosporin                                    | Cirrhosis (alcoholic / cryptogenic) | Former                |
| 6                                                                                                      | Female     | 1975             | 40                | Bowen's Disease: 2019 (1)                                                                            | BCC: 2017 (1)                                                                                                                                                                                                                                         | Tacrolimus,<br>Prednisolone                    | Primary sclerosing cholangitis      | Never                 |
| 7                                                                                                      | Female     | 1983             | 26                | BCC: 2018 (1)                                                                                        | -                                                                                                                                                                                                                                                     | Tacrolimus, Azathioprine,<br>Prednisolone      | Autoimmune hepatitis                | Never                 |
| 8                                                                                                      | Female     | 1946             | 30                | BCC: 2018 (1), 2019 (1), 2020 (1)                                                                    | BCC: 2001 (3), 2002 (1), 2010 (1),<br>2014 (2), 2017 (2)<br>Actinic keratosis: 2010 (1), 2011 (1),<br>2012 (1)                                                                                                                                        | Everolimus,<br>Prednisolone                    | Polycystic liver disease            | Never                 |
| 9                                                                                                      | Female     | 1960             | 46                | Bowen's Disease: 2019 (1)                                                                            | -                                                                                                                                                                                                                                                     | Tacrolimus,<br>Prednisolone                    | Cirrhosis (alcoholic / cryptogenic) | Unknown               |
| 10                                                                                                     | Male       | 1943             | 51                | Actinic keratosis: 2018 (3), 2021 (3)<br>Bowen's Disease: 2018 (1)<br>BCC: 2020 (1)<br>SCC: 2018 (2) | -                                                                                                                                                                                                                                                     | Tacrolimus,<br>Mycophenolate,<br>Prednisolone  | Cirrhosis (alcoholic / cryptogenic) | Never                 |
| 11                                                                                                     | Male       | 1946             | 54                | BCC: 2019 (2), 2020 (1) 2021 (1)                                                                     | Actinic keratosis: 2017 (1)                                                                                                                                                                                                                           | Tacrolimus,<br>Mycophenolate                   | Primary sclerosing cholangitis      | Unknown               |
| 12                                                                                                     | Male       | 1947             | 66                | SCC: 2018 (1)                                                                                        | Actinic keratosis: 2017 (1)                                                                                                                                                                                                                           | Tacrolimus,<br>Mycophenolate                   | Primary biliary cholangitis         | Former                |
| 13                                                                                                     | Female     | 1950             | 42                | Actinic keratosis: 2021 (1)<br>BCC: 2019 (2), 2020 (3), 2021 (2)                                     | BCC: 1994 (1), 1995 (1), 1997 (1),<br>1998 (2), 1999 (3), 2000 (2), 2009<br>(1), 2011 (1), 2012 (1), 2016 (3),<br>2017 (2)<br>Actinic keratosis: 1997 (2), 1998 (1),<br>2010 (1), 2014 (2), 2015 (1), 2016 (1)<br>Bowen's Disease: 1998 (1), 2016 (1) | Mycophenolate,<br>Prednisolone                 | Polycystic liver disease            | Never                 |

|    |        |      |    |                                                                            |                                                                                     |                                               |                                                |         |
|----|--------|------|----|----------------------------------------------------------------------------|-------------------------------------------------------------------------------------|-----------------------------------------------|------------------------------------------------|---------|
|    |        |      |    |                                                                            | SCC: 2004 (1), 2012 (1), 2016 (2)                                                   |                                               |                                                |         |
| 14 | Male   | 1953 | 42 | Actinic keratosis: 2019 (1)                                                | Actinic keratosis: 2005 (1)<br>SCC: 2005 (2), 2006 (1)<br>Bowen's Disease: 2006 (1) | Cyclosporin, Azathioprine                     | Hepatitis B virus                              | Former  |
| 15 | Female | 1971 | 20 | Actinic keratosis: 2019 (1)<br>BCC: 2019 (2)<br>SCC: 2019 (1)              | BCC: 2006 (1)<br>SCC: 2017 (1)                                                      | Tacrolimus,<br>Mycophenolate                  | Epithelioid Hemangio-<br>endothelioma          | Current |
| 16 | Female | 1942 | 50 | Actinic keratosis: 2019 (1)                                                | -                                                                                   | Tacrolimus, Azathioprine,<br>Prednisolone     | Primary biliary<br>cholangitis                 | Former  |
| 17 | Male   | 1955 | 53 | Actinic keratosis: 2019 (1)<br>BCC: 2020 (1)                               | BCC: 2013 (1)<br>MM: 2017 (1)                                                       | Tacrolimus,<br>Mycophenolate                  | Autoimmune hepatitis                           | Never   |
| 18 | Male   | 1960 | 47 | Actinic keratosis: 2020 (2)<br>SCC: 2019 (1)                               | BCC: 2014 (1)                                                                       | Tacrolimus,<br>Mycophenolate                  | Cirrhosis (alcoholic /<br>cryptogenic          | Never   |
| 19 | Male   | 1946 | 57 | Actinic keratosis: 2019 (1), 2020 (2), 2021 (2)<br>SCC: 2020 (1), 2021 (2) | Actinic keratosis: 2013 (2), 2014 (1)<br>SCC: 2014 (1)                              | Everolimus,<br>Mycophenolate                  | Cirrhosis (alcoholic /<br>cryptogenic<br>& HCC | Former  |
| 20 | Male   | 1965 | 41 | BCC: 2021 (2)                                                              | BCC: 2012 (1), 2015 (2)                                                             | Tacrolimus,<br>Mycophenolate,<br>Prednisolone | Primary sclerosing<br>cholangitis              | Never   |
| 21 | Male   | 1961 | 46 | BCC: 2018 (1)                                                              | -                                                                                   | Tacrolimus,<br>Mycophenolate,<br>Prednisolone | Primary sclerosing<br>cholangitis              | Never   |
| 22 | Male   | 1975 | 32 | BCC: 2020 (1)                                                              | -                                                                                   | Tacrolimus,<br>Mycophenolate,<br>Prednisolone | Primary sclerosing<br>cholangitis              | Never   |
| 23 | Male   | 1961 | 47 | Bowen's Disease: 2019 (1), 2020 (1), 2021 (1)<br>BCC: 2021 (3)             | -                                                                                   | Tacrolimus,<br>Mycophenolate                  | Iatrogenic -antabus<br>induced hepatitis       | Current |
| 24 | Male   | 1958 | 49 | Actinic keratosis: 2021 (2)                                                | -                                                                                   | Tacrolimus,<br>Mycophenolate                  | Cirrhosis (alcoholic /<br>cryptogenic<br>& HCC | Never   |
| 25 | Female | 1949 | 60 | Actinic keratosis: 2020 (2), 2021 (1)<br>SCC: 2021 (1)                     | BCC: 2012 (2), 2015 (1)                                                             | Tacrolimus,<br>Mycophenolate,<br>Prednisolone | Primary biliary<br>cholangitis                 | Current |
| 26 | Male   | 1955 | 54 | BCC: 2018 (2)                                                              | SCC: 2011 (3), 2015 (1), 2016 (1)                                                   | Tacrolimus,<br>Mycophenolate,<br>Prednisolone | Primary sclerosing<br>cholangitis              | Never   |
| 27 | Male   | 1966 | 45 | BCC: 2021 (1)                                                              | -                                                                                   | Tacrolimus,<br>Mycophenolate                  | Primary sclerosing<br>cholangitis              | Never   |
| 28 | Male   | 1953 | 63 | BCC: 2020 (2)                                                              | -                                                                                   | Tacrolimus,<br>Mycophenolate                  | HCC                                            | Current |
| 29 | Female | 1953 | 64 | BCC: 2019 (1), 2020 (1)<br>SCC: 2021 (1)                                   | -                                                                                   | Tacrolimus,<br>Mycophenolate                  | HCC                                            | Never   |
| 30 | Female | 1948 | 51 | Actinic keratosis: 2018 (1), 2020 (1)                                      | -                                                                                   | Cyclosporin,<br>Mycophenolate                 | Cirrhosis (alcoholic /<br>cryptogenic)         | Current |

|           |        |      |    |                                                                         |                                                                                                                                                      |                                        |                                     |         |
|-----------|--------|------|----|-------------------------------------------------------------------------|------------------------------------------------------------------------------------------------------------------------------------------------------|----------------------------------------|-------------------------------------|---------|
|           |        |      |    |                                                                         |                                                                                                                                                      |                                        | & metabolic liver disease           |         |
| <b>31</b> | Male   | 1939 | 62 | Actinic keratosis: 2020 (2), 2021 (1)<br>BCC: 2021 (1)<br>SCC: 2019 (3) | SCC: 2005 (1), 2007 (2), 2008 (1)<br>BCC: 2005 (1), 2006 (2) Actinic keratosis: 2006 (2), 2007 (2), 2008 (2), 2010 (1), 2012 (1), 2015 (2), 2016 (1) | Cyclosporin, Mycophenolate             | Cirrhosis (alcoholic / cryptogenic) | Current |
| <b>32</b> | Female | 1957 | 39 | Actinic keratosis: 2020 (1)                                             | -                                                                                                                                                    | Tacrolimus, Azathioprine, Prednisolone | Autoimmune hepatitis                | Never   |
